# Supplementary material
Source: PubMed Central journal article supplement (PMC5033901)

# Supplemental Figure 1

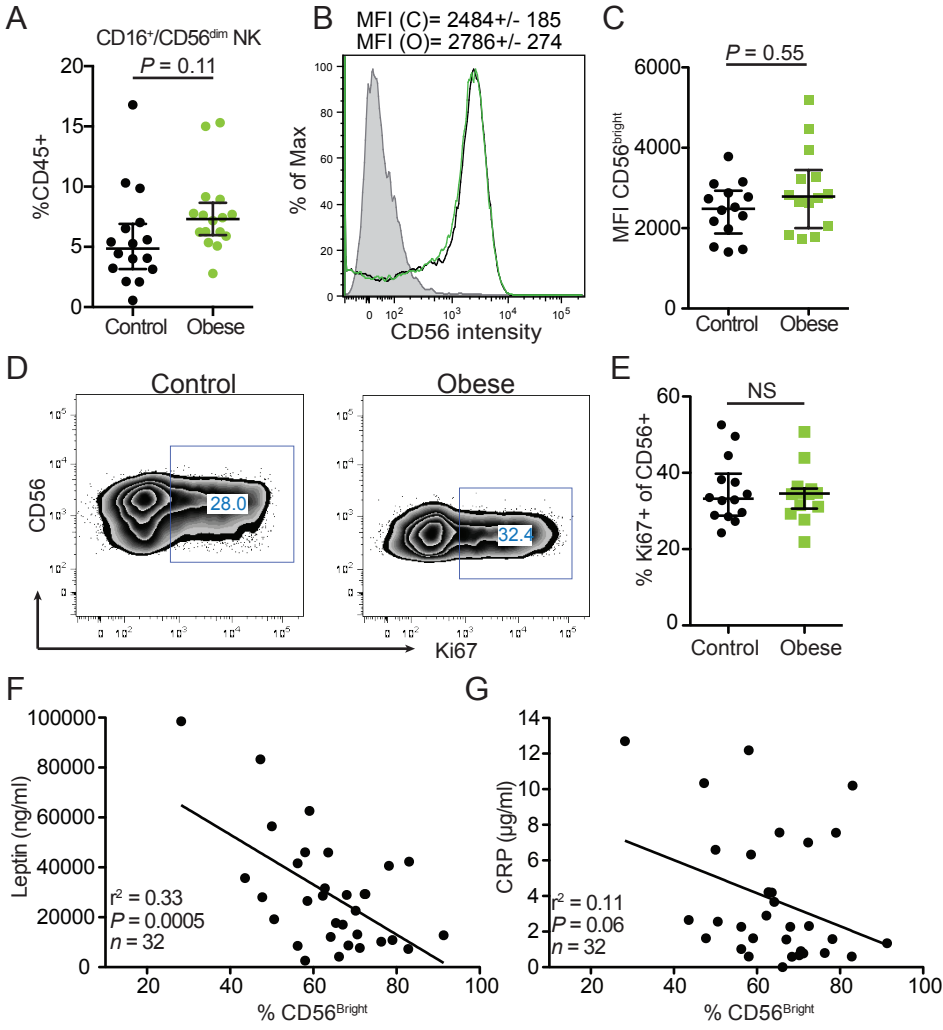

# Supplemental Figure 2

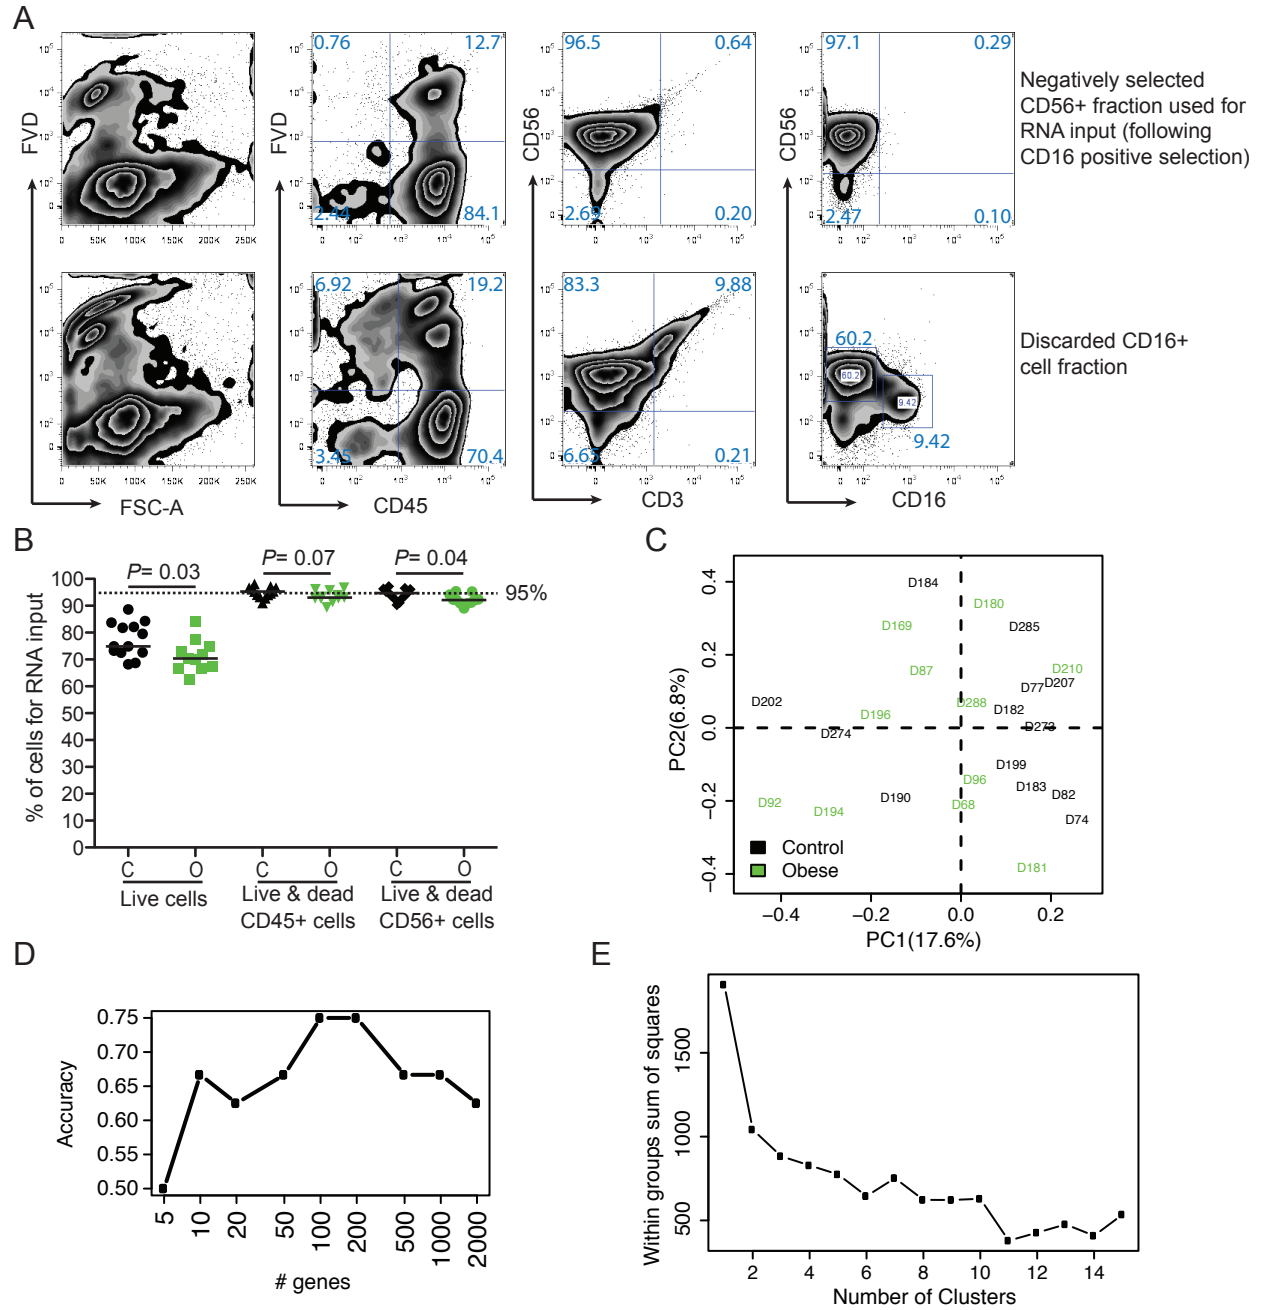

# Supplemental Figure 3

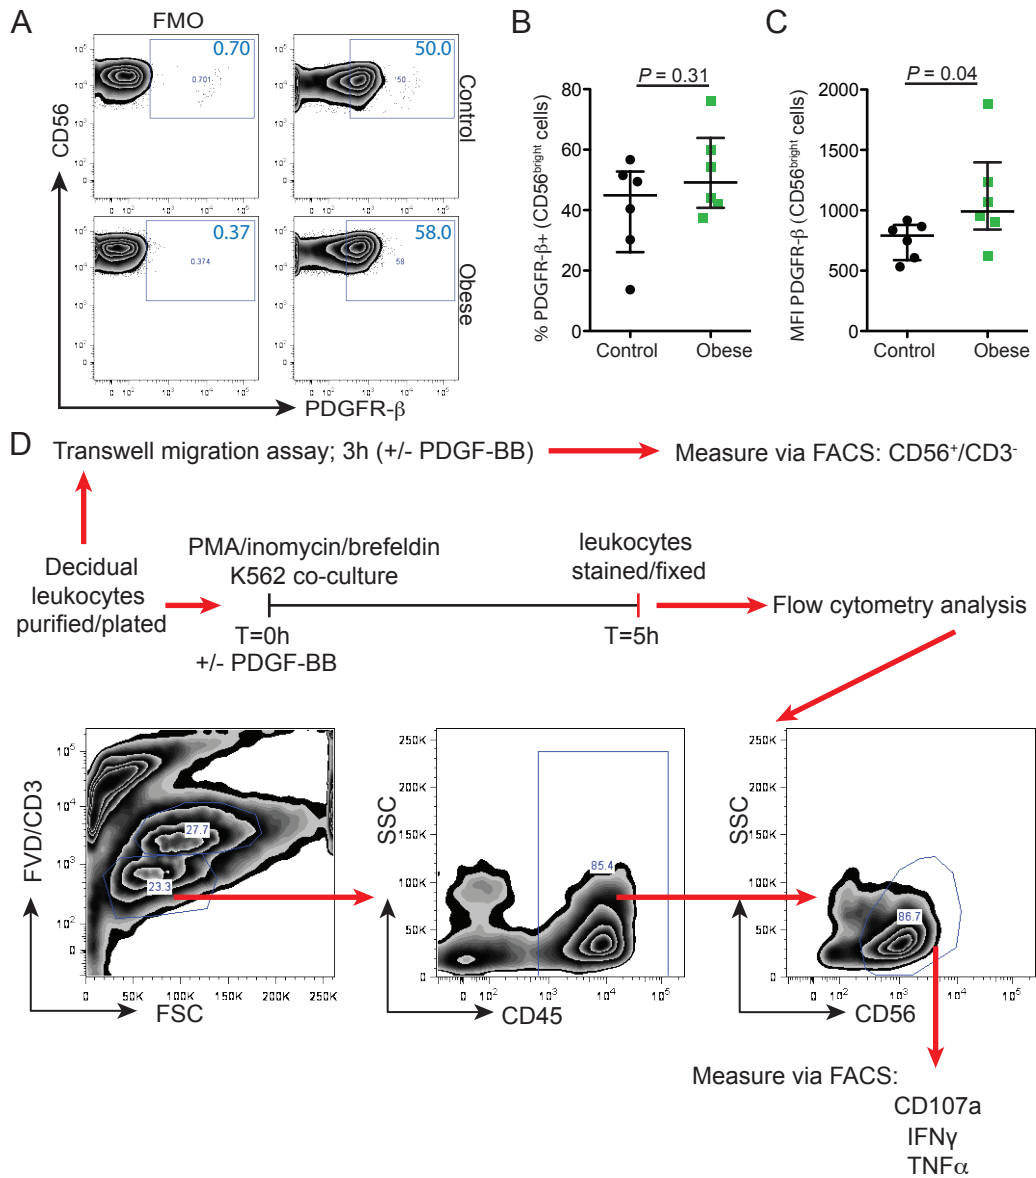

Supplemental Figure 4

Unedited Gel for Figure 5C\_Perdu et al

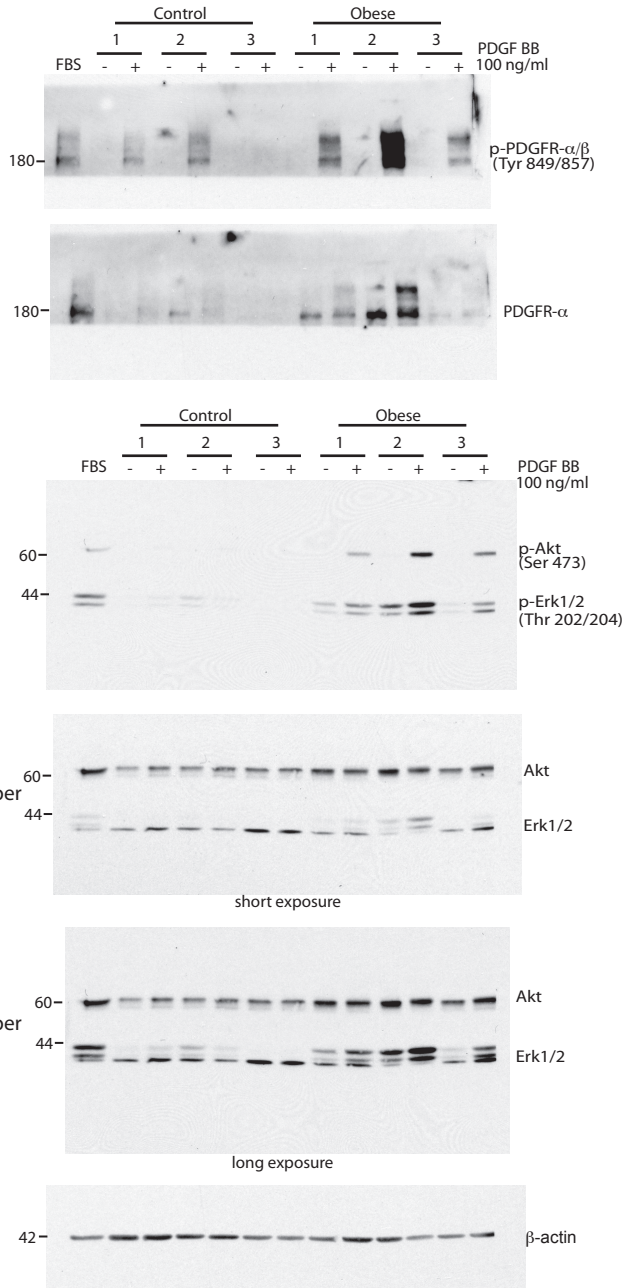

Unedited Gel for Figure 7B\_Perdu et al

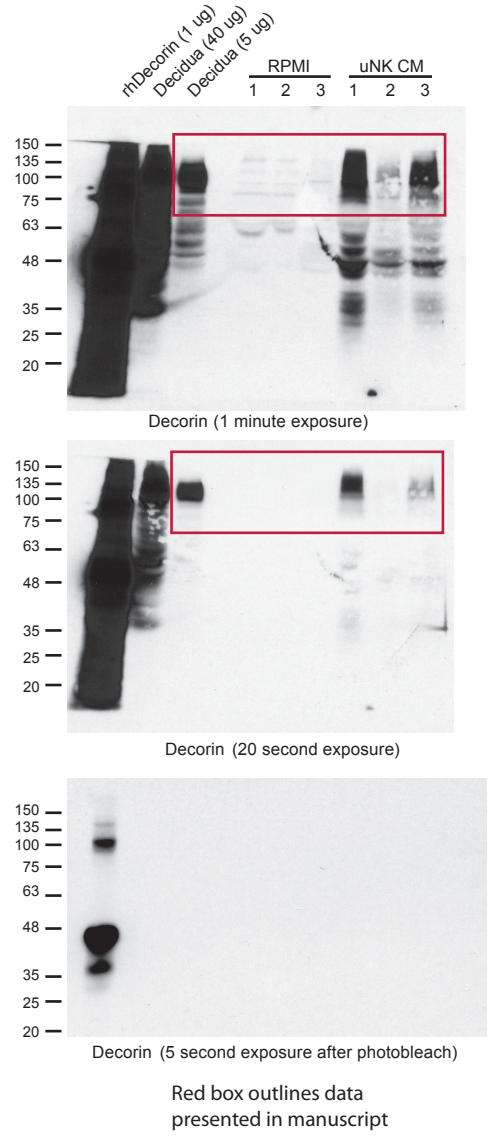

Supplement: jciinsight-1-85560-s001.pdf [file jciinsight-1-85560-s001.pdf]
